# Supplementary material for: Development of a Bile Acid-Related Gene Signature for Predicting Survival in Patients with Hepatocellular Carcinoma
Source: Hindawi journal article supplement (doi:10.1155/2022/9076175), 2022-05-10

**Supplementory file**

Table S1 A total of 127 genes related to the metabolism and transport of bile acid

Table S2 All HCC patients with risk score

Fig.S1 Go annotation of the identified genes

The annotation displayed that the differential expression genes involved in biological process (BP) including lipid transport, lipid localization, carboxylic acid synthesis and fatty acid metabolism, cellular component (CC) including basolateral plasma membrane and peroxsisomal membrane, and molecular function including lipid transporter activity, anion transmembrane transporter and ATPase activity.

Fig.S2 Analysis of the genes with differential expression with GO and KEGG

GO analysis showed that most of up-regulated genes involving in ABC transporters and most of genes with down-regulation involving in primary bile acid biosynthesis (A). KEGG analysis also displayed the genes takeing part in the processes of ABC transporters and primary bile acid sysnthesis (B).

Fig.S3 NPC1, ABCC1 and SLC51B had higher expression in HCC tissue.

NPC1 was stained in HCC (A) and non-HCC tissue (B); ABCC1 was stained in HCC (C) and non-HCC tissue (D); and SLC51B was stained in HCC (E) and non-HCC tissue (F). (200X)

Table S1

| Gene Symbel | | | | |
| --- | --- | --- | --- | --- |
| ABCA1 | APOA1 | HACL1 | PEX13 | SLCO1B3 |
| ABCA2 | AQP9 | HAO1 | PEX16 | SLCO2B1 |
| ABCA3 | AR | HSD17B11 | PEX19 | SOAT2 |
| ABCA4 | ATXN1 | HSD17B4 | PEX26 | SOD1 |
| ABCA5 | BAAT | HSD17B6 | PEX6 | SULT1B1 |
| ABCA6 | BBOX1 | HSD3B1 | PEX7 | SULT2B1 |
| ABCA8 | BCAR3 | HSD3B7 | PFKM | TFCP2L1 |
| ABCA9 | BMP6 | IDH1 | PHYH |  |
| ABCB11 | CAT | IDH2 | PIPOX |  |
| ABCC1 | CH25H | IDI1 | PNPLA8 |  |
| ABCC2 | CROT | ISOC1 | PRDX5 |  |
| ABCC3 | CYP27A1 | KLF1 | PXMP2 |  |
| ABCC6 | CYP39A1 | LCK | RBP1 |  |
| ABCD1 | CYP46A1 | LIPE | RETSAT |  |
| ABCD2 | CYP7A1 | LONP2 | RXRA |  |
| ABCD3 | CYP7B1 | MLYCD | RXRG |  |
| ABCG2 | CYP8B1 | NEDD4 | SCP2 |  |
| ABCG4 | DHCR24 | NPC1 | SERPINA6 |  |
| ABCG5 | DIO1 | NR0B2 | SLC10A1 |  |
| ABCG8 | DIO2 | NR1H4 | SLC10A2 |  |
| ACOT8 | EFHC1 | NR1I2 | SLC22A18 |  |
| ACSL1 | EPHX2 | NR3C2 | SLC23A1 |  |
| ACSL5 | FADS1 | NUDT12 | SLC23A2 |  |
| AGXT | FADS2 | OPTN | SLC27A2 |  |
| AKR1D1 | FDXR | PAOX | SLC27A5 |  |
| ALDH1A1 | GC | PECR | SLC29A1 |  |
| ALDH8A1 | GCLM | PEX1 | SLC35B2 |  |
| ALDH9A1 | GNMT | PEX11A | SLC51A |  |
| AMACR | GNPAT | PEX11G | SLC51B |  |
| TTR | GSTK1 | PEX12 | SLCO1A2 |  |

Table S2 All HCC patients with risk score

| Sample ID | Follow-up Time | Status | ABCC1 | NPC1 | SLC51B | riskScore | risk |
| --- | --- | --- | --- | --- | --- | --- | --- |
| TCGA-BC-A10U | 2.293 | 1 | 1.600 | 2.234 | 3.294 | 1.291 | high |
| TCGA-DD-A73D | 1.899 | 0 | 0.179 | 1.888 | 0.030 | 0.467 | low |
| TCGA-DD-A39Y | 0.468 | 1 | 1.584 | 1.945 | 5.112 | 1.521 | high |
| TCGA-ZP-A9CY | 2.142 | 0 | 0.647 | 1.477 | 3.497 | 0.769 | low |
| TCGA-CC-A123 | 0.600 | 0 | 0.551 | 1.695 | 3.380 | 0.803 | low |
| TCGA-BD-A3EP | 1.121 | 0 | 1.944 | 2.287 | 0.894 | 0.993 | high |
| TCGA-CC-A3MB | 0.863 | 1 | 1.572 | 2.400 | 2.700 | 1.248 | high |
| TCGA-BC-A10W | 0.249 | 1 | 2.919 | 2.611 | 2.228 | 1.795 | high |
| TCGA-DD-AADN | 2.460 | 0 | 1.328 | 1.795 | 6.003 | 1.539 | high |
| TCGA-DD-AADC | 1.164 | 1 | 1.801 | 2.612 | 1.972 | 1.286 | high |
| TCGA-G3-A5SI | 2.104 | 1 | 0.181 | 1.740 | 3.701 | 0.779 | low |
| TCGA-CC-A5UE | 0.745 | 1 | 1.083 | 2.988 | 5.671 | 2.197 | high |
| TCGA-CC-5258 | 0.353 | 1 | 1.401 | 3.601 | 4.324 | 2.470 | high |
| TCGA-NI-A4U2 | 4.907 | 1 | 1.972 | 1.642 | 1.335 | 0.830 | low |
| TCGA-UB-A7MB | 1.647 | 0 | 2.695 | 2.638 | 3.550 | 2.101 | high |
| TCGA-DD-A11B | 0.038 | 1 | 0.409 | 1.021 | 2.363 | 0.506 | low |
| TCGA-G3-A25X | 4.874 | 0 | 2.139 | 1.601 | 1.272 | 0.846 | low |
| TCGA-BW-A5NP | 0.000 | 0 | 0.406 | 1.421 | 1.938 | 0.554 | low |
| TCGA-DD-A3A5 | 8.562 | 1 | 0.294 | 1.792 | 4.572 | 0.938 | low |
| TCGA-GJ-A9DB | 0.184 | 1 | 2.009 | 2.807 | 3.393 | 1.830 | high |
| TCGA-DD-AAD0 | 0.375 | 0 | 0.165 | 1.916 | 1.766 | 0.616 | low |
| TCGA-G3-AAV5 | 0.970 | 0 | 0.479 | 2.017 | 1.569 | 0.675 | low |
| TCGA-CC-A8HS | 0.822 | 1 | 1.222 | 2.690 | 0.671 | 0.931 | low |
| TCGA-WQ-AB4B | 1.082 | 0 | 0.881 | 1.791 | 4.048 | 1.008 | high |
| TCGA-MI-A75G | 1.912 | 0 | 0.277 | 2.362 | 4.529 | 1.163 | high |
| TCGA-DD-AAC9 | 0.951 | 0 | 0.815 | 1.433 | 1.465 | 0.576 | low |
| TCGA-2Y-A9GS | 1.984 | 1 | 1.819 | 2.937 | 3.093 | 1.750 | high |
| TCGA-DD-AAD8 | 3.340 | 0 | 0.372 | 1.923 | 2.425 | 0.722 | low |
| TCGA-DD-A4NN | 2.463 | 1 | 0.606 | 2.617 | 1.611 | 0.891 | low |
| TCGA-DD-AACX | 0.466 | 0 | 1.694 | 2.385 | 3.540 | 1.459 | high |
| TCGA-DD-A3A3 | 1.466 | 1 | 0.595 | 1.214 | 1.715 | 0.518 | low |
| TCGA-G3-AAV3 | 1.129 | 0 | 1.895 | 1.642 | 0.281 | 0.691 | low |
| TCGA-ES-A2HT | 1.200 | 1 | 0.858 | 1.122 | 4.702 | 0.852 | low |
| TCGA-FV-A3I0 | 2.323 | 0 | 3.127 | 2.482 | 1.261 | 1.550 | high |
| TCGA-G3-A3CJ | 1.627 | 0 | 0.248 | 0.956 | 0.237 | 0.339 | low |
| TCGA-DD-A39X | 4.641 | 1 | 1.320 | 1.106 | 4.746 | 0.962 | high |
| TCGA-DD-A73E | 0.121 | 0 | 1.202 | 1.514 | 0.195 | 0.540 | low |
| TCGA-DD-AAE9 | 1.978 | 0 | 1.687 | 2.359 | 0.573 | 0.909 | low |
| TCGA-2Y-A9H9 | 1.910 | 0 | 0.380 | 2.033 | 1.721 | 0.678 | low |
| TCGA-BC-A69I | 1.060 | 0 | 0.628 | 1.571 | 1.160 | 0.552 | low |
| TCGA-FV-A2QQ | 1.997 | 0 | 1.053 | 1.877 | 4.407 | 1.154 | high |
| TCGA-DD-A11C | 1.814 | 0 | 0.867 | 2.014 | 1.001 | 0.683 | low |
| TCGA-DD-A3A2 | 5.838 | 1 | 0.892 | 1.286 | 1.461 | 0.554 | low |
| TCGA-BC-A10S | 3.899 | 1 | 0.785 | 1.369 | 2.679 | 0.673 | low |
| TCGA-G3-A6UC | 1.838 | 0 | 0.241 | 2.544 | 0.669 | 0.679 | low |
| TCGA-DD-AACJ | 5.759 | 0 | 0.504 | 1.624 | 3.155 | 0.744 | low |
| TCGA-DD-A1EG | 3.759 | 1 | 1.828 | 2.096 | 4.585 | 1.586 | high |
| TCGA-G3-AAV2 | 1.019 | 0 | 0.686 | 1.600 | 0.169 | 0.486 | low |
| TCGA-LG-A9QD | 1.003 | 0 | 0.478 | 1.132 | 1.884 | 0.499 | low |
| TCGA-DD-A4NI | 1.537 | 0 | 0.844 | 1.181 | 1.747 | 0.549 | low |
| TCGA-CC-A5UD | 0.833 | 1 | 3.747 | 2.418 | 1.654 | 1.890 | high |
| TCGA-DD-A4NB | 1.071 | 0 | 1.941 | 1.531 | 1.070 | 0.756 | low |
| TCGA-ZP-A9D0 | 1.964 | 0 | 1.381 | 2.031 | 3.171 | 1.103 | high |
| TCGA-G3-A7M8 | 1.178 | 0 | 0.609 | 1.173 | 1.757 | 0.515 | low |
| TCGA-DD-A4NQ | 1.022 | 1 | 2.394 | 4.957 | 0.979 | 3.258 | high |
| TCGA-DD-A73A | 1.995 | 0 | 0.466 | 1.490 | 2.061 | 0.589 | low |
| TCGA-BD-A3ER | 3.055 | 0 | 1.918 | 1.767 | 1.809 | 0.926 | low |
| TCGA-DD-AACL | 0.293 | 1 | 2.334 | 2.531 | 2.988 | 1.678 | high |
| TCGA-CC-A8HU | 0.942 | 1 | 0.432 | 3.097 | 3.415 | 1.362 | high |
| TCGA-DD-A118 | 9.416 | 0 | 2.031 | 2.022 | 1.105 | 0.946 | low |
| TCGA-RC-A7S9 | 1.753 | 0 | 1.072 | 1.466 | 1.695 | 0.647 | low |
| TCGA-ED-A7XP | 1.096 | 0 | 1.828 | 2.380 | 2.770 | 1.338 | high |
| TCGA-G3-AAV1 | 0.984 | 1 | 1.671 | 2.706 | 1.719 | 1.241 | high |
| TCGA-DD-A1EF | 1.079 | 1 | 0.904 | 2.088 | 1.860 | 0.812 | low |
| TCGA-DD-AAVQ | 7.474 | 0 | 1.310 | 1.804 | 2.601 | 0.906 | low |
| TCGA-2Y-A9H7 | 3.200 | 0 | 0.437 | 1.585 | 5.369 | 1.016 | high |
| TCGA-DD-AAE7 | 1.764 | 0 | 0.670 | 1.086 | 1.104 | 0.457 | low |
| TCGA-5R-AA1D | 0.923 | 0 | 1.849 | 1.946 | 1.308 | 0.903 | low |
| TCGA-BC-A112 | 0.419 | 1 | 3.890 | 2.924 | 0.754 | 2.085 | high |
| TCGA-DD-A3A1 | 0.638 | 1 | 1.349 | 1.794 | 3.743 | 1.089 | high |
| TCGA-G3-A25Y | 1.238 | 1 | 1.518 | 2.107 | 3.572 | 1.254 | high |
| TCGA-DD-AACP | 1.137 | 0 | 0.620 | 2.160 | 2.912 | 0.913 | low |
| TCGA-MR-A8JO | 0.904 | 0 | 2.516 | 1.896 | 1.783 | 1.136 | high |
| TCGA-FV-A4ZQ | 0.033 | 0 | 1.287 | 2.468 | 1.295 | 0.956 | high |
| TCGA-DD-A1EK | 1.529 | 1 | 1.645 | 2.747 | 3.962 | 1.775 | high |
| TCGA-2Y-A9GW | 3.482 | 1 | 1.953 | 1.755 | 2.587 | 1.050 | high |
| TCGA-DD-AADB | 3.403 | 0 | 1.038 | 2.837 | 3.747 | 1.517 | high |
| TCGA-DD-AADI | 2.973 | 0 | 0.899 | 1.369 | 3.681 | 0.810 | low |
| TCGA-G3-AAV4 | 0.074 | 1 | 0.447 | 2.020 | 1.075 | 0.621 | low |
| TCGA-ED-A4XI | 1.058 | 0 | 1.329 | 1.748 | 1.816 | 0.788 | low |
| TCGA-CC-A3MC | 0.995 | 0 | 2.452 | 2.608 | 2.220 | 1.584 | high |
| TCGA-DD-A3A4 | 1.677 | 1 | 0.257 | 1.644 | 0.119 | 0.439 | low |
| TCGA-WX-AA44 | 1.685 | 0 | 2.771 | 1.800 | 1.429 | 1.106 | high |
| TCGA-KR-A7K2 | 1.800 | 0 | 1.172 | 1.873 | 1.942 | 0.810 | low |
| TCGA-2Y-A9GU | 5.312 | 0 | 0.684 | 1.543 | 1.195 | 0.557 | low |
| TCGA-UB-A7MC | 1.370 | 0 | 1.804 | 2.264 | 0.947 | 0.957 | high |
| TCGA-DD-AACY | 3.973 | 0 | 0.938 | 1.341 | 0.971 | 0.531 | low |
| TCGA-DD-AADQ | 1.195 | 0 | 0.888 | 1.264 | 1.069 | 0.516 | low |
| TCGA-CC-A7II | 1.093 | 0 | 2.563 | 1.878 | 0.212 | 0.894 | low |
| TCGA-DD-A73B | 0.775 | 1 | 1.744 | 2.908 | 4.013 | 1.958 | high |
| TCGA-5R-AA1C | 0.997 | 0 | 2.099 | 1.937 | 1.076 | 0.927 | low |
| TCGA-KR-A7K7 | 1.115 | 0 | 1.187 | 1.702 | 3.075 | 0.907 | low |
| TCGA-G3-A25V | 2.356 | 0 | 0.890 | 1.432 | 2.587 | 0.699 | low |
| TCGA-DD-A116 | 4.444 | 1 | 1.485 | 2.120 | 4.396 | 1.421 | high |
| TCGA-K7-A5RG | 1.422 | 0 | 2.189 | 2.525 | 3.982 | 1.881 | high |
| TCGA-EP-A3RK | 0.995 | 0 | 1.897 | 2.432 | 2.911 | 1.422 | high |
| TCGA-BC-A10Q | 3.110 | 1 | 2.984 | 2.672 | 0.583 | 1.448 | high |
| TCGA-DD-A4NA | 2.762 | 0 | 3.617 | 3.395 | 0.256 | 2.163 | high |
| TCGA-CC-A9FU | 0.000 | 0 | 0.313 | 3.053 | 3.277 | 1.270 | high |
| TCGA-DD-A4NH | 1.890 | 0 | 1.998 | 3.162 | 4.274 | 2.409 | high |
| TCGA-DD-AACV | 4.195 | 0 | 0.254 | 1.709 | 4.869 | 0.941 | low |
| TCGA-DD-A4NE | 1.808 | 1 | 1.254 | 1.300 | 3.052 | 0.784 | low |
| TCGA-G3-AAUZ | 1.315 | 0 | 0.355 | 1.326 | 2.265 | 0.554 | low |
| TCGA-CC-5262 | 0.282 | 1 | 0.617 | 2.518 | 3.911 | 1.228 | high |
| TCGA-ED-A7XO | 1.170 | 0 | 0.816 | 1.834 | 4.393 | 1.064 | high |
| TCGA-G3-A3CG | 1.844 | 0 | 0.805 | 2.063 | 4.506 | 1.182 | high |
| TCGA-BC-A10T | 2.293 | 1 | 1.431 | 1.923 | 3.442 | 1.117 | high |
| TCGA-UB-A7MD | 0.142 | 1 | 2.046 | 2.183 | 2.913 | 1.340 | high |
| TCGA-2Y-A9H2 | 4.742 | 0 | 4.145 | 3.141 | 0.306 | 2.266 | high |
| TCGA-DD-AAE2 | 1.748 | 0 | 0.787 | 1.712 | 2.823 | 0.788 | low |
| TCGA-BC-A69H | 1.216 | 0 | 1.123 | 1.708 | 2.481 | 0.815 | low |
| TCGA-CC-A9FW | 0.679 | 0 | 1.595 | 3.158 | 0.897 | 1.280 | high |
| TCGA-DD-A1EJ | 2.753 | 1 | 0.392 | 3.262 | 2.427 | 1.234 | high |
| TCGA-DD-AACG | 1.285 | 1 | 0.864 | 2.167 | 2.015 | 0.849 | low |
| TCGA-DD-A39Z | 1.647 | 1 | 0.271 | 1.238 | 3.679 | 0.652 | low |
| TCGA-DD-A3A9 | 2.551 | 1 | 1.343 | 2.333 | 3.632 | 1.322 | high |
| TCGA-DD-AACO | 5.140 | 0 | 1.953 | 1.808 | 4.373 | 1.415 | high |
| TCGA-XR-A8TG | 2.460 | 0 | 0.932 | 1.875 | 1.391 | 0.699 | low |
| TCGA-DD-A4NS | 6.729 | 1 | 2.015 | 2.265 | 0.667 | 0.968 | high |
| TCGA-ZP-A9CZ | 1.934 | 0 | 2.198 | 2.363 | 1.878 | 1.275 | high |
| TCGA-K7-A5RF | 1.729 | 0 | 1.094 | 1.305 | 1.726 | 0.613 | low |
| TCGA-HP-A5N0 | 2.060 | 1 | 1.232 | 1.586 | 1.702 | 0.708 | low |
| TCGA-RC-A6M5 | 0.041 | 0 | 1.634 | 1.438 | 2.204 | 0.802 | low |
| TCGA-DD-AAVS | 4.995 | 0 | 0.556 | 2.323 | 1.750 | 0.799 | low |
| TCGA-5C-A9VG | 0.899 | 0 | 1.078 | 2.319 | 1.864 | 0.932 | low |
| TCGA-DD-A11D | 4.274 | 1 | 0.359 | 2.209 | 6.678 | 1.562 | high |
| TCGA-CC-A7IH | 1.000 | 0 | 0.480 | 2.437 | 0.622 | 0.688 | low |
| TCGA-DD-AAE4 | 1.666 | 0 | 0.616 | 0.998 | 2.444 | 0.536 | low |
| TCGA-2Y-A9H4 | 3.978 | 0 | 0.370 | 1.906 | 1.734 | 0.644 | low |
| TCGA-ZS-A9CD | 3.797 | 1 | 1.361 | 1.745 | 2.664 | 0.906 | low |
| TCGA-FV-A495 | 0.003 | 0 | 1.000 | 1.396 | 2.498 | 0.699 | low |
| TCGA-DD-AADA | 3.378 | 0 | 0.713 | 1.532 | 2.965 | 0.736 | low |
| TCGA-CC-5264 | 0.279 | 1 | 1.675 | 2.508 | 0.554 | 0.958 | high |
| TCGA-YA-A8S7 | 1.129 | 1 | 3.260 | 2.934 | 5.426 | 3.667 | high |
| TCGA-5R-AAAM | 0.126 | 1 | 1.369 | 1.681 | 2.313 | 0.838 | low |
| TCGA-G3-A5SM | 1.425 | 0 | 1.495 | 1.872 | 3.389 | 1.104 | high |
| TCGA-G3-AAV7 | 0.989 | 0 | 2.461 | 3.276 | 1.347 | 1.806 | high |
| TCGA-G3-A7M6 | 1.732 | 0 | 0.960 | 2.907 | 0.535 | 0.927 | low |
| TCGA-DD-AACF | 1.000 | 1 | 0.593 | 2.422 | 3.359 | 1.078 | high |
| TCGA-G3-A3CK | 1.603 | 0 | 0.910 | 1.397 | 0.200 | 0.478 | low |
| TCGA-RC-A6M3 | 0.000 | 0 | 2.336 | 2.554 | 1.083 | 1.260 | high |
| TCGA-CC-A5UC | 0.951 | 1 | 1.004 | 2.910 | 5.367 | 1.991 | high |
| TCGA-EP-A3JL | 0.830 | 0 | 1.436 | 1.714 | 1.790 | 0.797 | low |
| TCGA-XR-A8TF | 1.899 | 1 | 0.452 | 2.228 | 4.240 | 1.104 | high |
| TCGA-DD-AAE1 | 1.512 | 0 | 0.351 | 2.263 | 1.780 | 0.743 | low |
| TCGA-DD-A1EL | 1.137 | 1 | 2.838 | 2.735 | 3.170 | 2.137 | high |
| TCGA-2Y-A9H1 | 3.367 | 1 | 0.690 | 0.752 | 2.840 | 0.527 | low |
| TCGA-LG-A9QC | 1.164 | 0 | 0.932 | 2.139 | 0.554 | 0.681 | low |
| TCGA-DD-AADS | 1.299 | 0 | 0.303 | 1.144 | 4.178 | 0.684 | low |
| TCGA-CC-A7IE | 0.595 | 1 | 1.277 | 2.844 | 5.091 | 1.996 | high |
| TCGA-WJ-A86L | 0.945 | 0 | 2.066 | 2.763 | 2.475 | 1.583 | high |
| TCGA-DD-AACK | 0.025 | 0 | 0.622 | 2.408 | 3.778 | 1.153 | high |
| TCGA-WX-AA47 | 1.523 | 1 | 1.028 | 0.931 | 1.163 | 0.476 | low |
| TCGA-ED-A82E | 1.118 | 0 | 4.122 | 2.330 | 0.985 | 1.815 | high |
| TCGA-CC-5261 | 0.266 | 1 | 2.413 | 2.668 | 2.294 | 1.624 | high |
| TCGA-DD-A3A7 | 1.148 | 1 | 1.858 | 1.142 | 2.151 | 0.751 | low |
| TCGA-PD-A5DF | 1.751 | 1 | 2.331 | 1.834 | 2.539 | 1.187 | high |
| TCGA-CC-A9FS | 0.578 | 0 | 0.404 | 2.087 | 4.666 | 1.101 | high |
| TCGA-BC-A216 | 3.701 | 0 | 2.064 | 2.211 | 2.246 | 1.227 | high |
| TCGA-UB-A7MA | 1.466 | 0 | 3.048 | 2.349 | 1.165 | 1.419 | high |
| TCGA-CC-A3MA | 0.830 | 1 | 5.056 | 2.421 | 0.402 | 2.196 | high |
| TCGA-T1-A6J8 | 0.063 | 0 | 1.374 | 2.224 | 3.754 | 1.302 | high |
| TCGA-DD-A4ND | 6.115 | 0 | 1.498 | 2.319 | 2.828 | 1.209 | high |
| TCGA-UB-AA0U | 0.896 | 0 | 1.527 | 2.438 | 2.363 | 1.188 | high |
| TCGA-BW-A5NO | 0.055 | 0 | 0.607 | 2.595 | 4.690 | 1.425 | high |
| TCGA-DD-AADM | 0.033 | 1 | 0.514 | 1.741 | 4.602 | 0.979 | high |
| TCGA-DD-AAEK | 2.923 | 0 | 1.482 | 2.088 | 2.185 | 0.994 | high |
| TCGA-GJ-A6C0 | 0.085 | 1 | 2.532 | 2.848 | 7.778 | 4.220 | high |
| TCGA-DD-AAD6 | 1.841 | 0 | 0.788 | 2.664 | 2.287 | 1.057 | high |
| TCGA-UB-A7ME | 1.332 | 0 | 1.205 | 2.386 | 2.844 | 1.152 | high |
| TCGA-QA-A7B7 | 0.258 | 0 | 2.344 | 2.409 | 0.934 | 1.165 | high |
| TCGA-DD-A73C | 1.921 | 0 | 0.853 | 1.760 | 0.382 | 0.559 | low |
| TCGA-ZP-A9CV | 2.981 | 1 | 0.709 | 2.069 | 1.956 | 0.777 | low |
| TCGA-2Y-A9GT | 4.449 | 1 | 1.014 | 1.767 | 0.571 | 0.602 | low |
| TCGA-CC-5263 | 0.353 | 1 | 3.176 | 3.272 | 0.446 | 1.891 | high |
| TCGA-ZS-A9CE | 3.400 | 0 | 0.197 | 1.572 | 5.335 | 0.944 | low |
| TCGA-DD-A39V | 1.762 | 1 | 1.119 | 1.601 | 4.301 | 1.036 | high |
| TCGA-DD-AADW | 1.608 | 0 | 1.161 | 2.632 | 4.405 | 1.600 | high |
| TCGA-2Y-A9H3 | 4.153 | 0 | 1.161 | 0.978 | 1.846 | 0.559 | low |
| TCGA-DD-AAE3 | 1.551 | 0 | 0.528 | 1.182 | 5.852 | 0.956 | high |
| TCGA-DD-AAVU | 6.033 | 0 | 0.732 | 2.184 | 5.437 | 1.406 | high |
| TCGA-O8-A75V | 1.474 | 0 | 1.529 | 2.004 | 2.192 | 0.975 | high |
| TCGA-ES-A2HS | 1.885 | 1 | 0.299 | 0.567 | 2.347 | 0.409 | low |
| TCGA-DD-AACZ | 0.468 | 1 | 2.056 | 3.971 | 7.193 | 5.304 | high |
| TCGA-DD-AADU | 1.518 | 0 | 1.550 | 1.929 | 2.463 | 0.992 | high |
| TCGA-ED-A8O6 | 0.153 | 1 | 0.909 | 1.851 | 2.659 | 0.838 | low |
| TCGA-RC-A7SK | 1.293 | 0 | 0.660 | 1.682 | 2.292 | 0.694 | low |
| TCGA-DD-AADD | 3.373 | 0 | 0.359 | 3.215 | 1.542 | 1.046 | high |
| TCGA-DD-AAEG | 1.970 | 0 | 1.128 | 1.454 | 3.090 | 0.811 | low |
| TCGA-RC-A6M4 | 0.060 | 0 | 0.647 | 1.869 | 1.548 | 0.663 | low |
| TCGA-G3-A25Z | 1.795 | 0 | 0.355 | 2.414 | 2.472 | 0.880 | low |
| TCGA-CC-A8HT | 0.384 | 1 | 2.432 | 2.687 | 3.953 | 2.128 | high |
| TCGA-DD-AAW0 | 5.521 | 0 | 1.366 | 2.623 | 4.429 | 1.689 | high |
| TCGA-DD-A11A | 0.216 | 0 | 0.460 | 2.940 | 1.543 | 0.964 | high |
| TCGA-2Y-A9H5 | 1.521 | 1 | 0.981 | 2.567 | 2.863 | 1.171 | high |
| TCGA-DD-AAVW | 6.348 | 0 | 1.223 | 2.281 | 3.278 | 1.188 | high |
| TCGA-BD-A2L6 | 3.734 | 0 | 0.386 | 1.496 | 1.181 | 0.505 | low |
| TCGA-RC-A7SF | 1.586 | 0 | 1.139 | 1.253 | 3.284 | 0.774 | low |
| TCGA-CC-A7IJ | 1.047 | 0 | 2.953 | 3.132 | 1.888 | 2.111 | high |
| TCGA-G3-A7M9 | 0.153 | 1 | 2.661 | 2.969 | 4.114 | 2.591 | high |
| TCGA-WQ-A9G7 | 0.082 | 0 | 2.544 | 1.951 | 2.811 | 1.371 | high |
| TCGA-DD-A73F | 2.973 | 0 | 1.377 | 1.978 | 1.746 | 0.865 | low |
| TCGA-CC-5260 | 0.238 | 1 | 4.017 | 3.278 | 0.432 | 2.358 | high |
| TCGA-DD-A4NL | 4.688 | 0 | 0.956 | 1.360 | 0.692 | 0.515 | low |
| TCGA-DD-AAE0 | 1.521 | 0 | 1.594 | 1.943 | 2.865 | 1.074 | high |
| TCGA-2Y-A9H0 | 10.068 | 0 | 1.979 | 2.087 | 1.660 | 1.043 | high |
| TCGA-DD-AADJ | 2.921 | 0 | 0.325 | 1.404 | 2.939 | 0.629 | low |
| TCGA-DD-A4NP | 8.504 | 0 | 0.435 | 0.863 | 0.073 | 0.335 | low |
| TCGA-CC-A3M9 | 0.822 | 1 | 2.603 | 3.169 | 0.056 | 1.470 | high |
| TCGA-FV-A23B | 5.074 | 1 | 0.643 | 1.972 | 2.679 | 0.823 | low |
| TCGA-ED-A627 | 1.159 | 0 | 2.114 | 1.715 | 0.834 | 0.821 | low |
| TCGA-DD-AAW3 | 4.474 | 0 | 0.302 | 1.611 | 0.720 | 0.481 | low |
| TCGA-2Y-A9H8 | 1.734 | 1 | 0.648 | 2.557 | 0.890 | 0.786 | low |
| TCGA-DD-AADL | 1.742 | 0 | 0.384 | 2.111 | 3.862 | 0.976 | high |
| TCGA-G3-AAV6 | 0.178 | 1 | 0.315 | 2.175 | 3.653 | 0.951 | low |
| TCGA-DD-A1EE | 0.956 | 1 | 2.099 | 2.222 | 1.139 | 1.047 | high |
| TCGA-G3-A7M7 | 0.989 | 0 | 1.395 | 1.180 | 3.855 | 0.880 | low |
| TCGA-DD-AAVY | 5.397 | 0 | 0.751 | 1.970 | 5.292 | 1.269 | high |
| TCGA-2Y-A9GZ | 2.323 | 1 | 0.467 | 1.929 | 1.089 | 0.603 | low |
| TCGA-DD-AADP | 1.255 | 0 | 0.608 | 2.653 | 4.687 | 1.458 | high |
| TCGA-DD-A3A6 | 8.926 | 1 | 3.280 | 2.414 | 0.000 | 1.291 | high |
| TCGA-DD-A4NJ | 2.082 | 0 | 1.403 | 3.252 | 3.121 | 1.785 | high |
| TCGA-WX-AA46 | 2.071 | 0 | 0.608 | 1.328 | 1.106 | 0.495 | low |
| TCGA-DD-AACT | 4.279 | 0 | 1.170 | 1.708 | 1.592 | 0.719 | low |
| TCGA-EP-A12J | 0.904 | 0 | 0.609 | 1.910 | 0.620 | 0.578 | low |
| TCGA-CC-A7IL | 0.762 | 1 | 0.124 | 2.405 | 3.872 | 1.026 | high |
| TCGA-DD-A73G | 9.529 | 0 | 0.712 | 0.853 | 3.690 | 0.629 | low |
| TCGA-NI-A8LF | 1.660 | 0 | 0.702 | 2.187 | 0.560 | 0.654 | low |
| TCGA-DD-AAVP | 7.540 | 0 | 1.007 | 1.568 | 0.512 | 0.551 | low |
| TCGA-DD-AACB | 6.367 | 0 | 1.435 | 1.928 | 0.729 | 0.735 | low |
| TCGA-DD-AACI | 4.433 | 0 | 1.786 | 1.213 | 2.815 | 0.840 | low |
| TCGA-DD-AA3A | 1.123 | 1 | 4.718 | 3.077 | 0.382 | 2.598 | high |
| TCGA-ED-A7PY | 1.068 | 0 | 0.330 | 2.380 | 1.782 | 0.775 | low |
| TCGA-FV-A4ZP | 6.811 | 1 | 2.024 | 1.512 | 4.449 | 1.298 | high |
| TCGA-RG-A7D4 | 3.008 | 0 | 1.153 | 2.406 | 1.468 | 0.925 | low |
| TCGA-BC-4072 | 4.082 | 1 | 2.375 | 3.804 | 0.930 | 2.038 | high |
| TCGA-LG-A6GG | 1.060 | 0 | 0.465 | 2.781 | 6.466 | 1.948 | high |
| TCGA-G3-A25T | 4.255 | 0 | 2.740 | 2.049 | 0.285 | 1.014 | high |
| TCGA-DD-A119 | 0.611 | 1 | 0.456 | 1.513 | 2.266 | 0.613 | low |
| TCGA-DD-AADY | 1.521 | 0 | 0.582 | 2.024 | 7.782 | 1.826 | high |
| TCGA-DD-A1EA | 6.616 | 0 | 0.816 | 1.916 | 0.521 | 0.602 | low |
| TCGA-G3-A3CI | 0.493 | 0 | 1.145 | 1.735 | 1.534 | 0.715 | low |
| TCGA-DD-AACQ | 1.184 | 1 | 1.897 | 1.650 | 1.551 | 0.845 | low |
| TCGA-DD-A1EH | 4.096 | 0 | 0.797 | 2.585 | 3.651 | 1.270 | high |
| TCGA-MI-A75E | 1.389 | 0 | 0.884 | 2.163 | 2.940 | 0.984 | high |
| TCGA-CC-A8HV | 0.764 | 1 | 2.204 | 2.196 | 0.988 | 1.041 | high |
| TCGA-FV-A2QR | 1.592 | 1 | 0.462 | 2.319 | 5.799 | 1.462 | high |
| TCGA-DD-AAW1 | 5.449 | 0 | 0.813 | 1.970 | 0.540 | 0.616 | low |
| TCGA-G3-A5SL | 1.701 | 0 | 0.863 | 1.948 | 0.467 | 0.612 | low |
| TCGA-CC-5259 | 0.685 | 0 | 1.236 | 1.593 | 2.550 | 0.811 | low |
| TCGA-ED-A97K | 0.016 | 0 | 3.528 | 3.169 | 0.373 | 1.968 | high |
| TCGA-BC-4073 | 0.964 | 0 | 3.170 | 2.779 | 5.045 | 3.175 | high |
| TCGA-EP-A2KA | 0.978 | 0 | 1.503 | 1.542 | 1.059 | 0.676 | low |
| TCGA-XR-A8TC | 3.668 | 0 | 0.540 | 2.875 | 2.010 | 1.032 | high |
| TCGA-MR-A520 | 0.627 | 0 | 0.970 | 1.368 | 0.743 | 0.522 | low |
| TCGA-5C-AAPD | 0.055 | 0 | 1.844 | 1.709 | 1.682 | 0.870 | low |
| TCGA-DD-AACN | 3.567 | 0 | 1.014 | 1.780 | 1.707 | 0.722 | low |
| TCGA-DD-AACC | 4.616 | 1 | 1.379 | 1.536 | 3.084 | 0.894 | low |
| TCGA-BC-A217 | 1.153 | 0 | 1.544 | 2.038 | 3.286 | 1.176 | high |
| TCGA-2Y-A9GV | 6.937 | 1 | 0.946 | 1.932 | 0.437 | 0.619 | low |
| TCGA-BC-A10Z | 0.093 | 1 | 0.211 | 3.193 | 3.122 | 1.276 | high |
| TCGA-DD-AAEB | 1.310 | 0 | 0.443 | 1.398 | 0.046 | 0.413 | low |
| TCGA-MI-A75H | 2.047 | 0 | 0.618 | 1.299 | 0.978 | 0.481 | low |
| TCGA-DD-A4NR | 0.025 | 1 | 2.308 | 2.955 | 4.689 | 2.568 | high |
| TCGA-2Y-A9HB | 0.712 | 0 | 0.650 | 1.743 | 2.286 | 0.708 | low |
| TCGA-DD-AAEI | 4.195 | 0 | 1.489 | 2.015 | 5.374 | 1.588 | high |
| TCGA-DD-AAVR | 6.885 | 0 | 1.271 | 1.224 | 1.044 | 0.559 | low |
| TCGA-DD-A1ED | 6.304 | 0 | 1.111 | 0.965 | 0.364 | 0.436 | low |
| TCGA-G3-A5SJ | 1.912 | 0 | 1.526 | 1.956 | 1.080 | 0.804 | low |
| TCGA-DD-AAW2 | 5.082 | 0 | 0.420 | 1.582 | 0.777 | 0.495 | low |
| TCGA-3K-AAZ8 | 1.085 | 0 | 0.408 | 2.061 | 1.491 | 0.666 | low |
| TCGA-DD-AAVX | 4.707 | 0 | 0.574 | 1.793 | 3.605 | 0.869 | low |
| TCGA-ED-A7PX | 0.016 | 0 | 4.634 | 3.483 | 1.785 | 3.711 | high |
| TCGA-DD-AAC8 | 0.044 | 1 | 1.515 | 2.296 | 0.750 | 0.871 | low |
| TCGA-CC-A1HT | 0.277 | 1 | 4.885 | 3.156 | 2.659 | 3.990 | high |
| TCGA-BW-A5NQ | 0.000 | 0 | 0.969 | 3.128 | 3.516 | 1.613 | high |
| TCGA-DD-AADR | 5.556 | 0 | 0.453 | 2.359 | 6.649 | 1.691 | high |
| TCGA-BC-A8YO | 1.540 | 0 | 4.048 | 2.607 | 1.209 | 2.057 | high |
| TCGA-RC-A7SB | 1.611 | 0 | 1.217 | 1.694 | 4.555 | 1.147 | high |
| TCGA-K7-A6G5 | 1.403 | 0 | 0.854 | 1.552 | 5.086 | 1.070 | high |
| TCGA-DD-A115 | 6.964 | 1 | 0.639 | 1.981 | 2.422 | 0.792 | low |
| TCGA-DD-A1EC | 1.649 | 0 | 2.786 | 2.807 | 1.076 | 1.566 | high |
| TCGA-EP-A26S | 0.649 | 0 | 0.470 | 1.547 | 1.549 | 0.557 | low |
| TCGA-DD-AAEH | 2.148 | 0 | 0.954 | 1.569 | 1.316 | 0.616 | low |
| TCGA-2Y-A9HA | 0.099 | 1 | 1.646 | 3.032 | 2.654 | 1.622 | high |
| TCGA-DD-AAEA | 1.575 | 0 | 1.402 | 2.534 | 2.452 | 1.210 | high |
| TCGA-BC-A10X | 2.110 | 1 | 1.179 | 1.384 | 0.833 | 0.563 | low |
| TCGA-MI-A75I | 1.726 | 0 | 1.262 | 2.258 | 2.097 | 0.990 | high |
| TCGA-BC-A10R | 0.844 | 1 | 2.389 | 1.242 | 3.037 | 1.030 | high |
| TCGA-ZS-A9CG | 0.934 | 0 | 1.232 | 1.681 | 2.093 | 0.781 | low |
| TCGA-BC-A3KF | 0.022 | 0 | 1.746 | 2.605 | 3.054 | 1.496 | high |
| TCGA-EP-A2KB | 0.915 | 0 | 0.362 | 2.370 | 2.489 | 0.868 | low |
| TCGA-DD-A113 | 6.644 | 0 | 2.672 | 2.769 | 0.982 | 1.475 | high |
| TCGA-DD-AAEE | 2.219 | 0 | 0.691 | 2.479 | 2.710 | 1.023 | high |
| TCGA-DD-AAD1 | 1.545 | 0 | 1.878 | 2.296 | 2.287 | 1.217 | high |
| TCGA-UB-A7MF | 0.586 | 1 | 0.879 | 1.859 | 1.134 | 0.658 | low |
| TCGA-G3-A5SK | 2.038 | 0 | 0.403 | 1.607 | 3.042 | 0.707 | low |
| TCGA-FV-A496 | 0.027 | 0 | 0.822 | 2.494 | 3.915 | 1.284 | high |
| TCGA-BC-A3KG | 1.364 | 0 | 1.837 | 2.159 | 0.797 | 0.905 | low |
| TCGA-ZS-A9CF | 6.608 | 0 | 0.597 | 2.053 | 2.922 | 0.871 | low |
| TCGA-G3-A25U | 4.482 | 0 | 0.336 | 2.075 | 3.003 | 0.831 | low |
| TCGA-RC-A7SH | 1.282 | 0 | 1.233 | 2.546 | 4.037 | 1.488 | high |
| TCGA-ED-A459 | 1.118 | 0 | 2.645 | 1.875 | 1.162 | 1.057 | high |
| TCGA-DD-AACW | 3.901 | 0 | 0.288 | 2.067 | 1.708 | 0.669 | low |
| TCGA-ED-A7PZ | 0.016 | 0 | 0.295 | 2.657 | 1.133 | 0.774 | low |
| TCGA-RC-A6M6 | 0.025 | 0 | 3.109 | 2.276 | 7.233 | 3.598 | high |
| TCGA-CC-A9FV | 0.000 | 0 | 3.474 | 3.101 | 0.215 | 1.843 | high |
| TCGA-XR-A8TD | 2.822 | 0 | 1.950 | 2.603 | 2.346 | 1.413 | high |
| TCGA-DD-AACU | 4.293 | 0 | 1.128 | 2.549 | 2.265 | 1.101 | high |
| TCGA-FV-A3R3 | 1.003 | 1 | 1.794 | 1.758 | 2.228 | 0.953 | high |
| TCGA-DD-AAD2 | 1.803 | 0 | 1.211 | 1.653 | 1.309 | 0.680 | low |
| TCGA-DD-AAVZ | 5.205 | 0 | 0.545 | 2.141 | 2.462 | 0.829 | low |
| TCGA-2Y-A9GY | 2.074 | 1 | 3.054 | 3.201 | 1.776 | 2.189 | high |
| TCGA-DD-AACD | 1.044 | 1 | 0.685 | 0.948 | 1.840 | 0.487 | low |
| TCGA-ED-A66Y | 0.811 | 1 | 2.207 | 2.281 | 3.853 | 1.682 | high |
| TCGA-G3-A7M5 | 1.225 | 0 | 0.258 | 2.557 | 0.198 | 0.637 | low |
| TCGA-DD-A3A8 | 0.030 | 1 | 1.198 | 1.337 | 1.217 | 0.590 | low |
| TCGA-DD-AAD3 | 3.548 | 0 | 1.298 | 1.889 | 1.765 | 0.820 | low |
| TCGA-FV-A3R2 | 0.532 | 1 | 1.129 | 2.547 | 1.610 | 0.994 | high |
| TCGA-ZP-A9D2 | 2.036 | 0 | 3.380 | 3.017 | 1.037 | 1.976 | high |
| TCGA-K7-AAU7 | 0.984 | 0 | 3.184 | 2.638 | 1.421 | 1.716 | high |
| TCGA-DD-AAVV | 6.726 | 0 | 2.378 | 1.819 | 0.862 | 0.921 | low |
| TCGA-HP-A5MZ | 0.249 | 1 | 1.831 | 1.603 | 3.184 | 1.050 | high |
| TCGA-BC-A10Y | 1.948 | 1 | 0.583 | 2.088 | 3.332 | 0.938 | low |
| TCGA-BC-A5W4 | 1.499 | 1 | 1.178 | 1.989 | 3.677 | 1.113 | high |
| TCGA-DD-AAD5 | 3.685 | 0 | 3.296 | 3.533 | 5.162 | 4.503 | high |
| TCGA-DD-AADV | 1.573 | 0 | 1.373 | 1.914 | 2.807 | 0.993 | high |
| TCGA-DD-A39W | 2.266 | 1 | 0.385 | 2.274 | 0.797 | 0.647 | low |
| TCGA-DD-A4NF | 1.173 | 0 | 0.796 | 1.907 | 0.214 | 0.569 | low |
| TCGA-CC-A7IG | 0.819 | 1 | 2.733 | 2.196 | 1.522 | 1.300 | high |
| TCGA-5C-A9VH | 0.882 | 0 | 1.294 | 1.520 | 2.181 | 0.755 | low |
| TCGA-DD-A114 | 3.148 | 1 | 2.538 | 3.118 | 1.131 | 1.674 | high |
| TCGA-DD-AAED | 2.090 | 0 | 0.851 | 2.570 | 3.367 | 1.225 | high |
| TCGA-DD-AADG | 3.137 | 0 | 0.350 | 2.128 | 1.161 | 0.640 | low |
| TCGA-DD-AADO | 1.241 | 0 | 0.592 | 1.511 | 1.995 | 0.608 | low |
| TCGA-DD-A4NK | 3.315 | 1 | 0.512 | 1.857 | 2.588 | 0.749 | low |
| TCGA-G3-AAV0 | 1.304 | 0 | 0.249 | 1.019 | 2.982 | 0.533 | low |
| TCGA-4R-AA8I | 0.718 | 1 | 1.558 | 2.478 | 4.119 | 1.598 | high |
| TCGA-MI-A75C | 0.797 | 0 | 0.795 | 1.819 | 2.260 | 0.755 | low |
| TCGA-G3-A3CH | 2.137 | 0 | 1.536 | 2.138 | 2.476 | 1.076 | high |
| TCGA-DD-A1EI | 0.501 | 0 | 2.068 | 2.714 | 1.876 | 1.415 | high |
| TCGA-DD-A1EB | 5.526 | 0 | 0.532 | 1.838 | 2.369 | 0.722 | low |
| TCGA-DD-AACH | 0.534 | 1 | 2.990 | 2.313 | 0.317 | 1.208 | high |
| TCGA-DD-AACA | 6.304 | 0 | 0.154 | 2.381 | 1.758 | 0.737 | low |
| TCGA-KR-A7K0 | 0.178 | 1 | 2.237 | 2.337 | 0.899 | 1.095 | high |
| TCGA-ZP-A9D1 | 0.058 | 0 | 1.700 | 2.607 | 5.830 | 2.278 | high |
| TCGA-G3-A25S | 1.140 | 1 | 0.459 | 1.808 | 2.054 | 0.666 | low |
| TCGA-EP-A2KC | 0.052 | 1 | 1.159 | 1.574 | 1.168 | 0.636 | low |
| TCGA-XR-A8TE | 2.534 | 0 | 0.683 | 2.701 | 1.349 | 0.902 | low |
| TCGA-UB-AA0V | 0.860 | 0 | 1.298 | 1.269 | 0.305 | 0.511 | low |
| TCGA-ED-A66X | 1.112 | 0 | 1.426 | 2.245 | 1.885 | 0.995 | high |
| TCGA-ED-A5KG | 1.321 | 0 | 2.817 | 2.830 | 3.069 | 2.171 | high |
| TCGA-DD-AADF | 0.315 | 1 | 0.234 | 1.581 | 4.439 | 0.832 | low |
| TCGA-DD-AACE | 5.984 | 0 | 0.363 | 2.055 | 1.293 | 0.637 | low |
| TCGA-DD-AAE6 | 0.386 | 0 | 0.114 | 2.346 | 1.898 | 0.735 | low |
| TCGA-2Y-A9H6 | 0.978 | 0 | 1.175 | 1.492 | 2.832 | 0.801 | low |
| TCGA-DD-A4NV | 5.529 | 0 | 0.881 | 2.358 | 2.747 | 1.031 | high |
| TCGA-CC-A7IK | 0.718 | 1 | 1.793 | 2.266 | 0.235 | 0.855 | low |
| TCGA-DD-AACS | 4.942 | 0 | 2.022 | 3.251 | 0.943 | 1.496 | high |
| TCGA-ZP-A9D4 | 1.082 | 0 | 1.350 | 1.326 | 2.238 | 0.716 | low |
| TCGA-DD-AADK | 2.874 | 0 | 1.373 | 1.874 | 3.120 | 1.026 | high |
| TCGA-GJ-A3OU | 2.408 | 0 | 2.880 | 2.534 | 3.692 | 2.164 | high |
| TCGA-BC-A110 | 5.797 | 1 | 1.344 | 1.639 | 1.131 | 0.681 | low |
| TCGA-DD-A4NO | 6.151 | 0 | 1.779 | 2.362 | 2.470 | 1.252 | high |
| TCGA-ED-A8O5 | 1.112 | 0 | 0.536 | 2.024 | 2.327 | 0.773 | low |
| TCGA-DD-A4NG | 2.197 | 1 | 1.358 | 2.196 | 1.239 | 0.867 | low |
| TCGA-FV-A3I1 | 0.677 | 1 | 2.902 | 2.466 | 2.511 | 1.763 | high |
| TCGA-2Y-A9GX | 6.690 | 0 | 2.918 | 2.441 | 2.214 | 1.674 | high |
| TCGA-KR-A7K8 | 2.482 | 0 | 1.650 | 2.047 | 3.819 | 1.318 | high |
| TCGA-CC-A7IF | 1.778 | 1 | 1.039 | 1.738 | 2.277 | 0.782 | low |

S.Fig1.


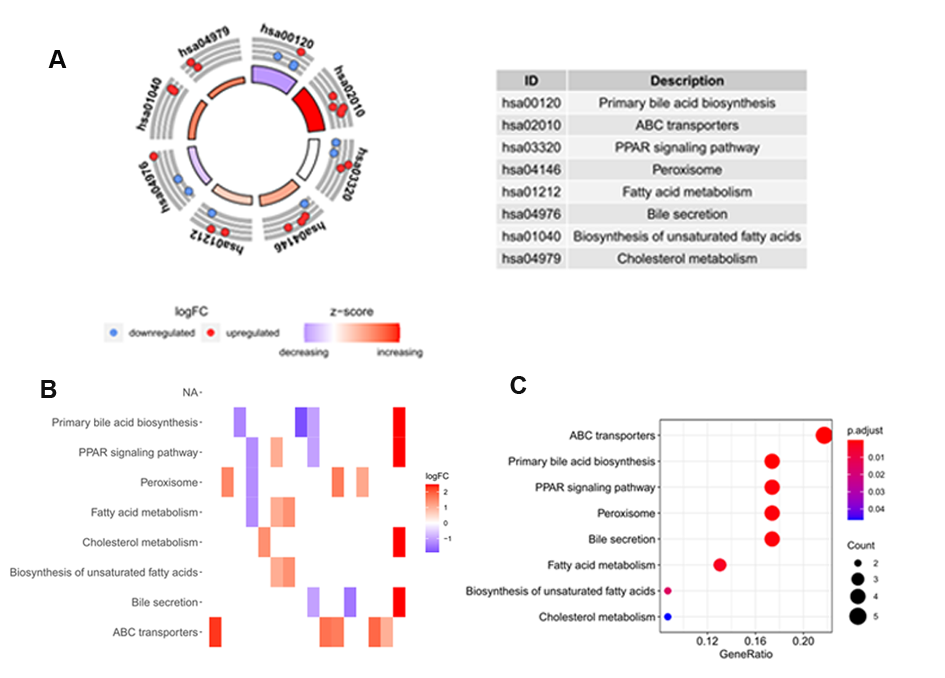


S.Fig.2


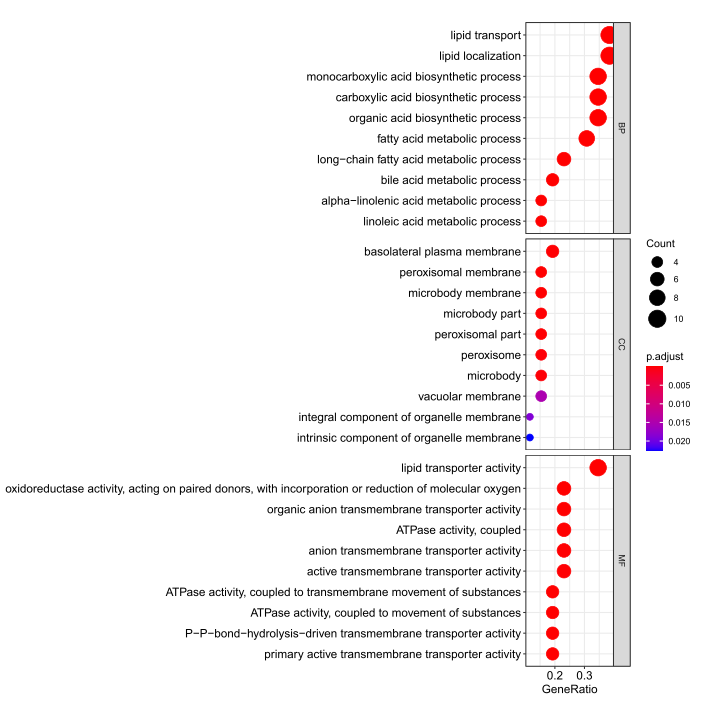


S.Fig.3


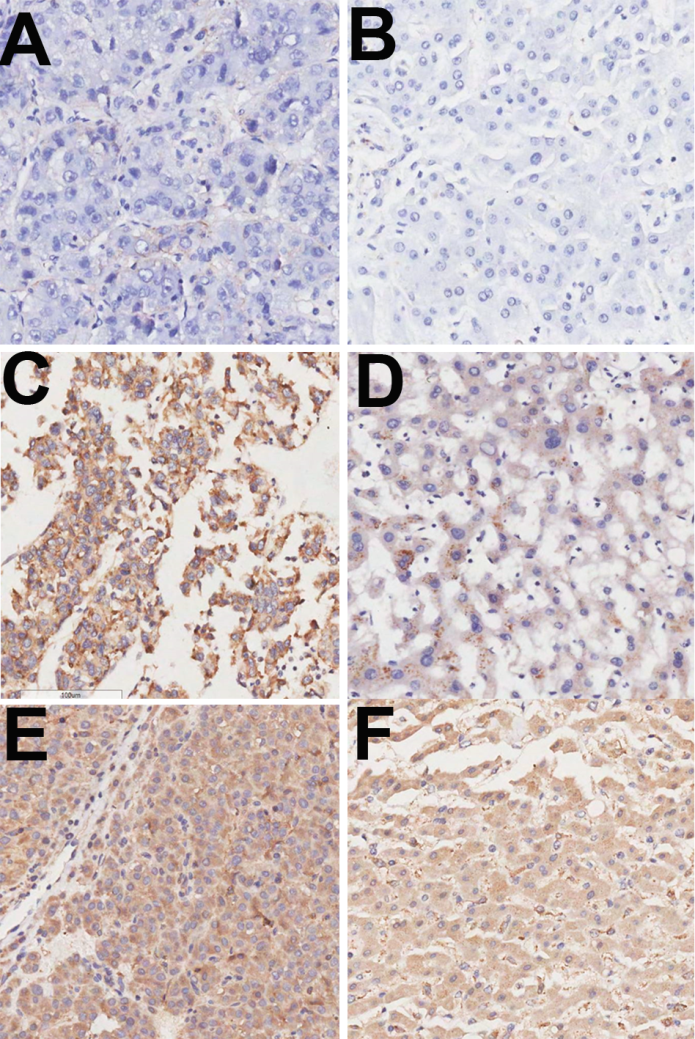

Supplement: f1 [file 9076175.f1.docx]
